# Supplementary material
Source: PubMed Central journal article supplement (PMC7476388)
Supplement: Supp_Table1.pdf [file Supp_Table1.pdf]

## Supplementary Data

| Supplementary Table S1. Participant Specialty Areas                                                                        |                                                                                                      |
|----------------------------------------------------------------------------------------------------------------------------|------------------------------------------------------------------------------------------------------|
| CRITICAL ACCESS HOSPITAL                                                                                                   | ACADEMIC MEDICAL CENTER                                                                              |
| Providers asked about perceptions of telemedicine for patients presenting with the following specialty-specific complaints | Providers asked about perceptions of telemedicine for patients presenting within their OWN specialty |
| • Adult critical care                                                                                                      | • EM                                                                                                 |
| • Cardiology (all and EKG only)                                                                                            | • Neurology                                                                                          |
| • Dentistry/oral surgery                                                                                                   | • Neurosurgery                                                                                       |
| • Dermatology                                                                                                              | • Ophthalmology                                                                                      |
| • EM                                                                                                                       | • Pediatric critical care/pediatric EM                                                               |
| • Neurology (stroke and nonstroke)                                                                                         | • Psychiatry                                                                                         |
| • Neurosurgery                                                                                                             |                                                                                                      |
| • Obstetrics and gynecology                                                                                                |                                                                                                      |
| • Ophthalmology                                                                                                            |                                                                                                      |
| • Orthopedics                                                                                                              |                                                                                                      |
| • Otolaryngology                                                                                                           |                                                                                                      |
| • Pediatrics                                                                                                               |                                                                                                      |
| • Pediatric critical care/pediatric EM                                                                                     |                                                                                                      |
| • Pharmacy (clinical pharmacy support and remote review and verification of medication orders)                             |                                                                                                      |
| • Psychiatry                                                                                                               |                                                                                                      |
| • Trauma surgery/emergency general surgery                                                                                 |                                                                                                      |
| • Urology                                                                                                                  |                                                                                                      |
| EKG, electro cardiogram; EM, emergency medicine.                                                                           |                                                                                                      |
