# Supplementary material
Source: PubMed Central journal article supplement (PMC7476388)
Supplement: Supp_Table2.pdf [file Supp_Table2.pdf]

**Supplementary Table S2. Perceptions of Telemedicine Among Critical Access Hospital Providers by Provider Type**

|                                       | IMPACT ON PATIENT CARE |                |              |            |                  |                  |              |            |            |       | FREQUENCY OF TM USE   |                       |             |           |           |  |       |  |         |  | PREVENTED INTER-HOSPITAL TRANSFERS |  |     |  |           |  |       |  |         |  |
|---------------------------------------|------------------------|----------------|--------------|------------|------------------|------------------|--------------|------------|------------|-------|-----------------------|-----------------------|-------------|-----------|-----------|--|-------|--|---------|--|------------------------------------|--|-----|--|-----------|--|-------|--|---------|--|
|                                       | ALL (N=44)             |                | APP (n=18)   |            | PHYSICIAN (n=23) |                  | OTHER (n=3)  |            | P-VALUE    |       | ALL                   |                       | APP         |           | PHYSICIAN |  | OTHER |  | P-VALUE |  | ALL                                |  | APP |  | PHYSICIAN |  | OTHER |  | P-VALUE |  |
|                                       |                        |                |              |            |                  |                  |              |            |            |       |                       |                       |             |           |           |  |       |  |         |  |                                    |  |     |  |           |  |       |  |         |  |
| Adult critical care                   | 55 (25-75)             | 61 (52-65)     | 45 (18-74)   | 55 (2-83)  | 0.640            | 22.5 (4.5-47.5)  | 13.5 (3-41)  | 32 (7-49)  | 17 (1-40)  | 0.363 | 15 (3-47)             | 26 (4-47.5)           | 11 (3-35)   | 20 (1-59) | 0.537     |  |       |  |         |  |                                    |  |     |  |           |  |       |  |         |  |
| Cardiology                            | 61 (41-76)             | 66 (52-71)     | 55 (28-78)   | 61 (2-67)  | 0.537            | 49 (17.5-75)     | 49 (21-75)   | 50 (18-77) | 2 (2-45)   | 0.202 | -                     | -                     | -           | -         | -         |  |       |  |         |  |                                    |  |     |  |           |  |       |  |         |  |
| Cardiology (EKG only)                 | 67.5 (48-82.5)         | 76 (53.5-90.5) | 54 (48-80)   | 42 (2-86)  | 0.198            | 35.5 (15-79.5)   | 67 (30-94)   | 33 (10-75) | 15 (2-79)  | 0.136 | 18 (3-46)             | 21.5 (4-46.5)         | 16 (2-35)   | 18 (2-62) | 0.650     |  |       |  |         |  |                                    |  |     |  |           |  |       |  |         |  |
| Dentistry/oral surgery                | 14.5 (10-21)           | 14 (8.5-20.5)  | 21 (5-41)    | 55 (1-83)  | 0.696            | 9.5 (3-27.5)     | 12.5 (3-35)  | 10 (3-22)  | 2 (1-8)    | 0.236 | -                     | -                     | -           | -         | -         |  |       |  |         |  |                                    |  |     |  |           |  |       |  |         |  |
| Dermatology                           | 56 (13-83)             | 61 (16-75)     | 62 (19-76)   | 52 (1-80)  | 0.854            | 38.5 (16-55.5)   | 45 (16-68)   | 29 (13-53) | 24 (2-52)  | 0.545 | 5 (2-21)              | 5 (2-12)              | 5 (1-22)    | 3 (2-50)  | 0.925     |  |       |  |         |  |                                    |  |     |  |           |  |       |  |         |  |
| EM                                    | 30 (16-49)             | 45.5 (19-81.5) | 49 (17-84)   | 49 (1-93)  | 0.975            | 21.5 (4.5-50)    | 17.5 (6-48)  | 24 (4-52)  | 28 (3-42)  | 0.967 | 28 (6-50)             | 19 (4-50)             | 36 (8-49)   | 18 (2-52) | 0.838     |  |       |  |         |  |                                    |  |     |  |           |  |       |  |         |  |
| Neurology (nonstroke)                 | 55 (17-71)             | 66.5 (43.5-74) | 67.5 (48-82) | 56 (13-88) | 0.789            | 46 (19.5-65)     | 46 (8-67)    | 51 (26-77) | 30 (28-41) | 0.580 | 28 (3-58)             | 28 (10.5-47.5)        | 28 (3-65)   | 22 (2-76) | 0.905     |  |       |  |         |  |                                    |  |     |  |           |  |       |  |         |  |
| Neurology (stroke)                    | 70 (61-73)             | 70 (60-82.5)   | 66.5 (52-89) | 59 (2-92)  | 0.736            | 36 (6-72.5)      | 19.5 (7-38)  | 51 (18-77) | 2 (2-92)   | 0.229 | 19 (4-48)             | 19.5 (5.5-49)         | 19 (3-61)   | 19 (3-26) | 0.881     |  |       |  |         |  |                                    |  |     |  |           |  |       |  |         |  |
| Neurosurgery                          | 29 (10-55)             | 29 (19-41)     | 25 (10-55)   | 55 (2-82)  | 0.879            | 17 (4-48)        | 16 (4-25)    | 19 (4-52)  | 3 (1-91)   | 0.591 | 10.5 (3-31)           | 5 (2-20.5)            | 14 (4-43)   | 17 (2-25) | 0.299     |  |       |  |         |  |                                    |  |     |  |           |  |       |  |         |  |
| Obstetrics and gynecology             | 38.5 (17-70)           | 41 (24-71)     | 33.5 (17-62) | 59 (2-78)  | 0.828            | 24 (6-53)        | 18 (6-53)    | 28 (11-51) | 2 (1-56)   | 0.433 | 50 <sup>a</sup> (N/A) | 50 <sup>a</sup> (N/A) | -           | -         | -         |  |       |  |         |  |                                    |  |     |  |           |  |       |  |         |  |
| Ophthalmology                         | 26 (16-60)             | 25 (21-67)     | 26 (16-51)   | 60 (2-85)  | 0.878            | 22 (3-50)        | 23 (4-45)    | 18 (5-50)  | 2 (1-58)   | 0.587 | 8 (3-27)              | 13 (3.5-40)           | 7 (3-21)    | 27 (2-31) | 0.637     |  |       |  |         |  |                                    |  |     |  |           |  |       |  |         |  |
| Orthopedics                           | 52 (20-80)             | 55 (20-83)     | 49 (24-76)   | 52 (1-88)  | 0.931            | 48 (15-65)       | 50 (15-71)   | 48 (21-54) | 19 (1-58)  | 0.540 | -                     | -                     | -           | -         | -         |  |       |  |         |  |                                    |  |     |  |           |  |       |  |         |  |
| Otolaryngology                        | 30.5 (18-72)           | 42 (25-72)     | 30 (17-71)   | 59 (2-87)  | 0.730            | 19 (4-50)        | 27 (14-50)   | 19 (3-57)  | 2 (1-30)   | 0.299 | 8.5 (3-27)            | 19 (4-41)             | 8 (2-24)    | 26 (2-38) | 0.357     |  |       |  |         |  |                                    |  |     |  |           |  |       |  |         |  |
| Pediatrics                            | 36.5 (14.5-63)         | 26 (12-55)     | 43 (17-66)   | 55 (2-68)  | 0.876            | 28.5 (15.5-53)   | 35 (12-62)   | 27 (17-54) | 19 (2-26)  | 0.372 | -                     | -                     | -           | -         | -         |  |       |  |         |  |                                    |  |     |  |           |  |       |  |         |  |
| Pediatric critical care/EM            | 55 (22-74)             | 36 (15-76)     | 60 (28-74)   | 63 (2-70)  | 0.670            | 28 (4.5-60.5)    | 18 (3-62)    | 36 (17-65) | 17 (2-49)  | 0.401 | 15 (4-32)             | 14 (6-33)             | 16 (4-32)   | 27 (3-30) | 0.960     |  |       |  |         |  |                                    |  |     |  |           |  |       |  |         |  |
| Pharmacy (clinical support)           | 46 (23-75)             | 45.5 (23-72)   | 46 (24-75)   | 53 (2-85)  | 0.937            | 22.5 (11.5-51)   | 27.5 (16-50) | 20 (8-51)  | 16 (2-63)  | 0.722 | 5 (3-25)              | 6 (3-18)              | 4 (2-42)    | 18 (2-30) | 0.745     |  |       |  |         |  |                                    |  |     |  |           |  |       |  |         |  |
| Pharmacy (remote review/verification) | 42 (11-74)             | 30.5 (11-74)   | 51.5 (13-70) | 53 (1-86)  | 0.947            | 19 (6.5-51.5)    | 32 (12-67)   | 13 (6-50)  | 3 (1-72)   | 0.360 | 5 (2-21)              | 8 (3-18)              | 3 (1-21)    | 19 (2-31) | 0.590     |  |       |  |         |  |                                    |  |     |  |           |  |       |  |         |  |
| Psychiatry                            | 88 (78-94)             | 90.5 (80-94)   | 82.5 (78-91) | 52 (39-97) | 0.253            | 75.5 (53.5-90.5) | 78.5 (66-93) | 72 (52-86) | 35 (1-92)  | 0.399 | 50 (24-73)            | 68 (48-76)            | 43 (18-73)  | 31 (2-47) | 0.051     |  |       |  |         |  |                                    |  |     |  |           |  |       |  |         |  |
| Trauma/emergency general surgery      | 45 (19-72)             | 42 (27-50)     | 49 (18-72)   | 58 (2-84)  | 0.968            | 28.5 (6.5-57)    | 20 (4-54)    | 42 (12-65) | 14 (2-58)  | 0.543 | 24 (8-44)             | 28 (21-50.5)          | 18.5 (3-40) | 14 (2-27) | 0.191     |  |       |  |         |  |                                    |  |     |  |           |  |       |  |         |  |
| Urology                               | 45 (13-66)             | 38.5 (7-77)    | 45 (13-63)   | 59 (2-84)  | 0.956            | 23 (7-58.5)      | 27 (8-59)    | 24 (11-51) | 3 (1-61)   | 0.466 | 20 (4-40)             | 18.5 (4-34.5)         | 18 (4-40)   | 26 (2-51) | 0.940     |  |       |  |         |  |                                    |  |     |  |           |  |       |  |         |  |

APP=advanced practice provider (n=11 PA and n=7 ARNP). Other includes missing provider type (n=2) and podiatry (n=1).

<sup>a</sup>Missing greater than 10% of responses.

ARNP, advanced registered nurse practitioner; N/A, not applicable; PA, physician assistant.
