# Supplementary material
Source: PubMed Central journal article supplement (PMC7476388)
Supplement: Supp_Table3.pdf [file Supp_Table3.pdf]

Supplementary Table S3. Perceptions of Telemedicine Among Providers at a Critical Access Hospital by Specialty Type

|                                       | IMPACT ON PATIENT CARE |                  |                  |                  |         |  | FREQUENCY OF TM USE |                  |                  |                  |         |  | PREVENTED INTER-HOSPITAL TRANSFERS |                  |                  |                  |         |  |
|---------------------------------------|------------------------|------------------|------------------|------------------|---------|--|---------------------|------------------|------------------|------------------|---------|--|------------------------------------|------------------|------------------|------------------|---------|--|
|                                       | FM                     | EM               | SURGERY          | OTHER            | P-VALUE |  | FM                  | EM               | SURGERY          | OTHER            | P-VALUE |  | FM                                 | EM               | SURGERY          | OTHER            | P-VALUE |  |
| Adult critical care                   | 52.0 (25.0-71.5)       | 59.5 (48.5-83.0) | 28.5 (13.0-63.5) | 61.0 (19.0-83.0) | 0.620   |  | 21.0 (6.0-48.5)     | 38.5 (29.5-48.0) | 1.0 (1.0-18.0)   | 17.0 (4.0-60.0)  | 0.250   |  | 15.0 (3.0-48.0)                    | 20.5 (8.0-41.0)  | 8.5 (2.5-26.0)   | 17.5 (1.0-45.0)  | 0.806   |  |
| Cardiology                            | 62.0 (50.0-77.5)       | 60.5 (41.0-76.0) | 32.0 (18.5-44.5) | 67.0 (52.0-81.0) | 0.159   |  | 51.0 (26.0-75.0)    | 31.0 (22.0-71.5) | 2.0 (1.0-65.0)   | 45.0 (2.0-82.0)  | 0.469   |  | -                                  | -                | -                | -                | -       |  |
| Cardiology (EKG only)                 | 67.0 (27.0-80.0)       | 59.0 (49.0-75.0) | 67.0 (51.0-87.5) | 84.0 (42.0-86.0) | 0.719   |  | 35.5 (15.5-75.0)    | 31.5 (22.5-78.0) | 53.0 (2.0-80.0)  | 79.0 (7.0-94.0)  | 0.966   |  | 17.0 (2.5-29)                      | 16.5 (6.5-34.5)  | 46.5 (23.5-56.0) | 24.5 (2.0-62.0)  | 0.556   |  |
| Dentistry/oral surgery                | 17.0 (5.0-41.0)        | 20.0 (11.0-34.5) | 15.0 (12.0-29.0) | 14.0 (7.0-58.0)  | 0.953   |  | 11.0 (5.0-28.5)     | 12.5 (3.0-40.5)  | 2.0 (1.0-20.0)   | 8.0 (2.0-78.0)   | 0.610   |  | -                                  | -                | -                | -                | -       |  |
| Dermatology                           | 66.0 (28.0-76.0)       | 14.5 (12.0-72.5) | 62.5 (39.0-77.0) | 52.0 (13.0-80.0) | 0.516   |  | 43.5 (18.5-55.5)    | 16.5 (9.5-39.5)  | 5.10 (19.0-73.0) | 38.0 (10.0-62.0) | 0.585   |  | 4.0 (2.0-10.0)                     | 4.0 (0.5-15.5)   | 43.0 (10.0-65.0) | 7.0 (2.0-50.0)   | 0.259   |  |
| EM                                    | 28.0 (12.0-73.0)       | 66.0 (28.5-84.5) | 76.0 (57.0-85.0) | 68.0 (40-93.0)   | 0.261   |  | 19.0 (4.0-39.0)     | 48.0 (25.0-53.5) | 2.0 (1.0-52.0)   | 28.0 (5.0-50.0)  | 0.187   |  | 28.0 (3.0-56.0)                    | 32.0 (18.0-49.0) | 40.5 (23.5-47.0) | 10.0 (1.0-50.0)  | 0.577   |  |
| Neurology (nonstroke)                 | 64.0 (42.0-75.0)       | 70.5 (55.0-80.5) | 76.0 (60.0-84.0) | 73.0 (56.0-88.0) | 0.533   |  | 50.5 (19.5-65.0)    | 46.0 (24.5-65.0) | 3.0 (1.0-53.0)   | 41.0 (30.0-73.0) | 0.531   |  | 27.0 (3.0-56.5)                    | 35.0 (23.0-65.5) | 11.5 (1.0-43.0)  | 25.0 (20.0-50.0) | 0.604   |  |
| Neurology (stroke)                    | 68.0 (52.0-82.0)       | 70.5 (63.0-88.0) | 76.0 (28.0-92.0) | 61.0 (9.0-91.0)  | 0.772   |  | 26.0 (10.0-67.5)    | 45.5 (27.0-63.0) | 2.0 (1.0-51.0)   | 37.0 (2.0-92.0)  | 0.454   |  | 21.5 (6.0-59.0)                    | 12.5 (4.0-35.0)  | 1.0 (0.5-33.0)   | 19.5 (18.0-22.0) | 0.237   |  |
| Neurosurgery                          | 27.0 (9.5-47.5)        | 36.5 (13.0-58.0) | 33 (17.5-69.5)   | 55.0 (40-77.0)   | 0.780   |  | 16.0 (5.0-35.5)     | 20.0 (7.5-44.0)  | 2.0 (2.0-50.0)   | 25.0 (3.0-59.0)  | 0.688   |  | 10.0 (4.0-29.0)                    | 4.0 (0.0-24.5)   | 46.5 (21.5-56.0) | 13.5 (2.0-23.0)  | 0.303   |  |
| Obstetrics and gynecology             | 33.5 (16.0-58.0)       | 29.0 (15.0-34.0) | 73 (62.0-78.0)   | 67.0 (11.0-78.0) | 0.076   |  | 24.5 (10.5-50.5)    | 22.0 (16.0-30.0) | 67.0 (27.0-70.0) | 6.0 (2.0-78.0)   | 0.733   |  | -                                  | -                | 50.0 (-)         | -                | -       |  |
| Ophthalmology                         | 24.0 (15.5-47.0)       | 62.0 (22.0-81.0) | 36.5 (20.5-49.0) | 29.0 (8.0-60.0)  | 0.380   |  | 18.0 (7.0-38.5)     | 30.5 (22.5-68.5) | 26.0 (1.5-50.0)  | 3.0 (2.0-51.0)   | 0.311   |  | 6.5 (3.0-21.0)                     | 22.0 (10.5-44.5) | 25.0 (5.5-46.0)  | 16.5 (2.0-30.0)  | 0.488   |  |
| Orthopedics                           | 50.5 (21.5-75.0)       | 49.0 (14.5-82.5) | 49.5 (36.5-63.0) | 71.0 (20-88.0)   | 0.964   |  | 43.0 (16.0-64.5)    | 41.5 (18.5-53.5) | 49.0 (24.5-57.5) | 58.0 (1.0-82.0)  | 0.962   |  | -                                  | -                | -                | -                | -       |  |
| Otolaryngology                        | 25.0 (12.0-34.0)       | 60.5 (33.5-72.0) | 61.0 (40.0-78.5) | 59.0 (17.0-87.0) | 0.189   |  | 16.5 (4.0-41.0)     | 33.0 (14.5-63.0) | 25.0 (0.5-62.0)  | 30.0 (2.0-49.0)  | 0.620   |  | 5.5 (3.0-17.5)                     | 26.0 (9.0-48.5)  | 29.0 (4.0-51.0)  | 26.0 (11.0-38.0) | 0.188   |  |
| Pediatrics                            | 27.0 (15.0-50.0)       | 26.0 (10.0-78.0) | 74.0 (58.0-78.0) | 52.0 (2.0-68.0)  | 0.136   |  | 25.5 (15.5-53.0)    | 34.0 (23.5-50.0) | 54.0 (3.0-55.0)  | 26.0 (3.0-47.0)  | 0.925   |  | -                                  | -                | -                | -                | -       |  |
| Pediatric critical care/EM            | 48.0 (17.0-73.0)       | 74.5 (40.5-84.0) | 62.0 (50.0-76.0) | 32.0 (2.0-70.0)  | 0.199   |  | 28.0 (4.5-48.0)     | 41.5 (20.0-76.5) | 50.0 (2.0-83.0)  | 17.0 (2.0-49.0)  | 0.464   |  | 16.5 (4.5-39.5)                    | 15.5 (9.0-26.5)  | 3.0 (1.0-7.0)    | 17.5 (3.0-30.0)  | 0.282   |  |
| Pharmacy (clinical support)           | 42.0 (23.0-74.0)       | 39.0 (10.0-61.0) | 65.0 (55.0-75.0) | 53.0 (8.0-85.0)  | 0.379   |  | 27.5 (8.5-50.5)     | 19.5 (16.0-40.0) | 38.0 (17.0-51.0) | 30.0 (15.0-63.0) | 0.942   |  | 5.0 (3.0-12.5)                     | 7.5 (1.0-30.5)   | 42.0 (2.0-63.0)  | 18.0 (2.0-30.0)  | 0.699   |  |
| Pharmacy (remote review/verification) | 26.0 (7.0-60.0)        | 23.5 (8.0-62.5)  | 74.0 (64.0-87.0) | 53.0 (7.0-86.0)  | 0.113   |  | 12.5 (7.0-44.5)     | 19.0 (6.0-49.0)  | 50.0 (           | 52.0 (3.0-72.0)  | 0.394   |  | 5.0 (2.5-9.0)                      | 5.5 (1.0-28.0)   | 42.0 (2.0-58.0)  | 18.5 (2.0-31.0)  | 0.462   |  |
| Psychiatry                            | 87.0 (78.0-91.0)       | 93.5 (85.0-96.0) | 79.0 (76.0-86.0) | 92.0 (52.0-97.0) | 0.257   |  | 73.5 (63.0-88.5)    | 85.5 (64.0-94.0) | 50.0 (3.0-82.0)  | 76.0 (35.0-92.0) | 0.382   |  | 55.0 (30.0-76.0)                   | 63.0 (37.0-74.5) | 30.0 (18.0-50.0) | 39.0 (31.0-47.0) | 0.230   |  |
| Trauma/emergency general surgery      | 41.0 (11.5-56.0)       | 48.5 (28.0-88.5) | 50.0 (47.0-61.5) | 58.0 (27.0-87.0) | 0.390   |  | 26.0 (5.5-52.0)     | 38.5 (21.5-58.0) | 2.0 (2.0-48.0)   | 42.0 (7.0-61.0)  | 0.453   |  | 24.0 (3.0-48.0)                    | 24.0 (13.0-38.0) | 28.0 (6.5-41.5)  | 23.5 (14.0-27.0) | 0.972   |  |
| Urology                               | 20.5 (7.5-55.0)        | 40.5 (10.0-70.0) | 53.0 (50.0-75.0) | 61.0 (45.0-92.0) | 0.108   |  | 21.5 (9.5-51.0)     | 21.5 (12.5-59.5) | 45.0 (11.0-61.0) | 50.0 (3.0-84.0)  | 0.958   |  | 15.0 (4.0-33.0)                    | 15.5 (8.5-41.0)  | 41.0 (20.0-44.5) | 23.5 (4.0-26.0)  | 0.807   |  |
